# Supplementary material for: Assembly of a coordination polymer with sulphate-capped pentamolybdate units and copper: synthesis, structure, magnetic and catalytic studies
Source: Royal Society of Chemistry journal article supplement (doi:10.1039/d2dt00816e), 2022-01-01
Supplement: d2dt00816e1.pdf [file d2dt00816e1.pdf]

# **Assembly of a coordination polymer with sulphate-capped pentamolybdate units and copper: Synthesis, Structure, Magnetic and Catalytic studies**

Yesleen Gupta,<sup>[a]</sup> Zakiullah Zaidi,<sup>[a]</sup> Sakshi Mehta,<sup>[b]</sup> Pranay R. Chandewar,<sup>[c]</sup> Nikhil Kumar,<sup>[d]</sup> Avijit K. Paul,<sup>[d]</sup> Debaprasad Shee,<sup>[c]</sup> Abhishake Mondal,<sup>[b]</sup> Laxmi Gayatri Sorokhaibam,<sup>[a]</sup> Abhishek Banerjee\*<sup>[a]</sup>

<sup>[a]</sup>: Department of Chemistry, Visvesvaraya National Institute of Technology, Nagpur, India

<sup>[b]</sup>: Solid State and Structural Chemistry Unit, Indian Institute of Science, Bangalore, India

<sup>[c]</sup>: Department of Chemical Engineering, Indian Institute of Technology Hyderabad, Hyderabad, India

<sup>[d]</sup>: Department of Chemistry, National Institute of Technology Kurukshetra, Kurukshetra, India

**SUPPORTING INFORMATION**

**Table S1: Selected bond lengths (Å) and bond valence sum calculations for compound 1, [Cu<sup>II</sup>(C<sub>5</sub>H<sub>5</sub>N)<sub>4</sub>]<sub>3</sub>[{Mo<sup>VI</sup><sub>5</sub>O<sub>15</sub>(SO<sub>4</sub>)<sub>2</sub>}{Cu<sup>II</sup>(C<sub>5</sub>H<sub>5</sub>N)<sub>3</sub>(DMF)(H<sub>2</sub>O)}] [Mo<sup>VI</sup><sub>5</sub>O<sub>15</sub>(SO<sub>4</sub>)<sub>2</sub>]<sub>2</sub>•2DMF**

| Bond     | Bond Length (Å) | Bond Valence | Bond Valence Sum   |
|----------|-----------------|--------------|--------------------|
| Mo1-O1A  | 1.706(4)        | 1.7215813    |                    |
| Mo1-O15  | 1.8969(4)       | 1.0276733    |                    |
| Mo1-O15S | 2.4504(4)       | 0.2302364    | Σ(Mo1) = 6.0468364 |
| Mo1-O1S  | 2.3275(4)       | 0.3209447    |                    |
| Mo1-O12  | 1.8871(4)       | 1.0552564    |                    |
| Mo1-O1C  | 1.7126(4)       | 1.6911443    |                    |

| Bond     | Bond Length (Å) | Bond Valence | Bond Valence Sum   |
|----------|-----------------|--------------|--------------------|
| Mo2-O2B  | 1.7091(4)       | 1.707275     |                    |
| Mo2-O2A  | 1.6977(4)       | 1.760637     |                    |
| Mo2-O12  | 1.8972(4)       | 1.0268404    | Σ(Mo2) = 6.0297979 |
| Mo2-O2S  | 2.3492(4)       | 0.3026631    |                    |
| Mo2-O23S | 2.412(4)        | 0.2554152    |                    |
| Mo2-O23  | 1.9156(4)       | 0.9770248    |                    |

| Bond     | Bond Length (Å) | Bond Valence | Bond Valence Sum   |
|----------|-----------------|--------------|--------------------|
| Mo3-O3B  | 1.6995(4)       | 1.7520925    |                    |
| Mo3-O3A  | 1.7188(4)       | 1.6630423    |                    |
| Mo3-O23  | 1.9107(4)       | 0.9900498    | Σ(Mo3) = 6.0534558 |
| Mo3-O23S | 2.2637(4)       | 0.3813438    |                    |
| Mo3-O34S | 2.4207(4)       | 0.2494795    |                    |
| Mo3-O34  | 1.9006(4)       | 1.017448     |                    |

| Bond     | Bond Length (Å) | Bond Valence | Bond Valence Sum   |
|----------|-----------------|--------------|--------------------|
| Mo4-O4B  | 1.7035(5)       | 1.733253     |                    |
| Mo4-O4A  | 1.7029(5)       | 1.736066     |                    |
| Mo4-O34  | 1.9153(4)       | 0.9778173    | Σ(Mo4) = 5.9494347 |
| Mo4-O34S | 2.4145(4)       | 0.2536952    |                    |
| Mo4-O45S | 2.4216(4)       | 0.2488734    |                    |
| Mo4-O45  | 1.9071(4)       | 0.9997298    |                    |

| <b>Bond</b> | <b>Bond Length (Å)</b> | <b>Bond Valence</b> | <b>Bond Valence Sum</b>          |
|-------------|------------------------|---------------------|----------------------------------|
| Mo5-O5A     | 1.7004(4)              | 1.7478359           |                                  |
| Mo5-O45     | 1.9141(4)              | 0.9809938           |                                  |
| Mo5-O45S    | 2.3867(4)              | 0.273491            | $\Sigma(\text{Mo5}) = 6.0084316$ |
| Mo5-O15S    | 2.2759(4)              | 0.3689748           |                                  |
| Mo5-O15     | 1.9162(4)              | 0.9754417           |                                  |
| Mo5-O5C     | 1.7191(4)              | 1.6616945           |                                  |

| <b>Bond</b> | <b>Bond Length (Å)</b> | <b>Bond Valence</b> | <b>Bond Valence Sum</b>         |
|-------------|------------------------|---------------------|---------------------------------|
| Mo6-O6A     | 1.7024(4)              | 1.7384136           |                                 |
| Mo6-O610    | 1.895(4)               | 1.0329641           |                                 |
| Mo6-O61S    | 2.4667(4)              | 0.2203137           | $\Sigma(\text{Mo6}) = 6.045759$ |
| Mo6-O6S     | 2.32(4)                | 0.3275167           |                                 |
| Mo6-O67     | 1.8904(4)              | 1.0458865           |                                 |
| Mo6-O6C     | 1.7149(4)              | 1.6806644           |                                 |

| <b>Bond</b> | <b>Bond Length (Å)</b> | <b>Bond Valence</b> | <b>Bond Valence Sum</b>         |
|-------------|------------------------|---------------------|---------------------------------|
| Mo7-O7A     | 1.6778(5)              | 1.8579235           |                                 |
| Mo7-O7B     | 1.7112(5)              | 1.6975554           |                                 |
| Mo7-O67     | 1.8895(4)              | 1.0484337           | $\Sigma(\text{Mo7}) = 6.166415$ |
| Mo7-O7S     | 2.3795(4)              | 0.2788651           |                                 |
| Mo7-O78S    | 2.3994(3)              | 0.2642629           |                                 |
| Mo7-O78     | 1.8999(4)              | 1.0193745           |                                 |

| <b>Bond</b> | <b>Bond Length (Å)</b> | <b>Bond Valence</b> | <b>Bond Valence Sum</b>          |
|-------------|------------------------|---------------------|----------------------------------|
| Mo8-O8B     | 1.7025(4)              | 1.7379438           |                                  |
| Mo8-O8A     | 1.7158(4)              | 1.6765813           |                                  |
| Mo8-O78     | 1.9296(4)              | 0.940747            | $\Sigma(\text{Mo8}) = 5.9651965$ |
| Mo8-O78S    | 2.2695(4)              | 0.3754125           |                                  |
| Mo8-O89S    | 2.4402(4)              | 0.2366718           |                                  |
| Mo8-O89     | 1.9078(4)              | 0.9978402           |                                  |

| <b>Bond</b> | <b>Bond Length (Å)</b> | <b>Bond Valence</b> | <b>Bond Valence Sum</b>          |
|-------------|------------------------|---------------------|----------------------------------|
| Mo9-O9B     | 1.7037(4)              | 1.7323164           |                                  |
| Mo9-O9A     | 1.7026(5)              | 1.7374742           |                                  |
| Mo9-O89     | 1.9119(4)              | 0.9868441           | $\Sigma(\text{Mo9}) = 5.9405739$ |
| Mo9-O89S    | 2.4459(4)              | 0.2330537           |                                  |
| Mo9-O91S    | 2.3862(4)              | 0.2738609           |                                  |
| Mo9-O910    | 1.9156(4)              | 0.9770248           |                                  |

| <b>Bond</b> | <b>Bond Length (Å)</b> | <b>Bond Valence</b> | <b>Bond Valence Sum</b> |
|-------------|------------------------|---------------------|-------------------------|
| Mo10-O10A   | 1.7022(4)              | 1.7393535           |                         |

|           |           |           |                                   |
|-----------|-----------|-----------|-----------------------------------|
| Mo10-O910 | 1.9056(4) | 1.003791  |                                   |
| Mo10-O91S | 2.4206(4) | 0.249547  | $\Sigma(\text{Mo10}) = 6.0120666$ |
| Mo10-O61S | 2.2584(4) | 0.3868456 |                                   |
| Mo10-O610 | 1.9214(4) | 0.9618287 |                                   |
| Mo10-O10C | 1.7171(4) | 1.6707009 |                                   |

| <b>Bond</b> | <b>Bond Length (Å)</b> | <b>Bond Valence</b> | <b>Bond Valence Sum</b>          |
|-------------|------------------------|---------------------|----------------------------------|
| Cu1-O1C     | 2.3623 (4)             | 0.157748            |                                  |
| Cu1-O6C     | 2.3615(4)              | 0.1580894           |                                  |
| Cu1-N11     | 2.061(5)               | 0.432645            | $\Sigma(\text{Cu1}) = 2.0929649$ |
| Cu1-N12     | 2.0502(5)              | 0.4454596           |                                  |
| Cu1-N13     | 2.0473(5)              | 0.4489648           |                                  |
| Cu1-N14     | 2.0464(5)              | 0.4500582           |                                  |

| <b>Bond</b> | <b>Bond Length (Å)</b> | <b>Bond Valence</b> | <b>Bond Valence Sum</b>          |
|-------------|------------------------|---------------------|----------------------------------|
| Cu2-O10C    | 2.3752(4)              | 0.1523429           |                                  |
| Cu2-O8A     | 2.4447(4)              | 0.126254            |                                  |
| Cu2-N21     | 2.0198(4)              | 0.4836052           | $\Sigma(\text{Cu2}) = 2.1756362$ |
| Cu2-N22     | 2.0265(5)              | 0.4749268           |                                  |
| Cu2-N23     | 2.0247(4)              | 0.4772429           |                                  |
| Cu2-N24     | 2.0373(5)              | 0.4612644           |                                  |

| <b>Bond</b> | <b>Bond Length (Å)</b> | <b>Bond Valence</b> | <b>Bond Valence Sum</b>         |
|-------------|------------------------|---------------------|---------------------------------|
| Cu3-O3A     | 2.4757(4)              | 0.116107            |                                 |
| Cu3-O5C     | 2.3327(4)              | 0.1708863           |                                 |
| Cu3-N31     | 2.0281(5)              | 0.4728775           | $\Sigma(\text{Cu3}) = 2.164094$ |
| Cu3-N32     | 2.0264(4)              | 0.4750552           |                                 |
| Cu3-N33     | 2.0362(5)              | 0.4626378           |                                 |
| Cu3-N34     | 2.0331(4)              | 0.4665302           |                                 |

| <b>Bond</b> | <b>Bond Length (Å)</b> | <b>Bond Valence</b> | <b>Bond Valence Sum</b>          |
|-------------|------------------------|---------------------|----------------------------------|
| Cu4-O1W     | 2.0056(5)              | 0.4136634           |                                  |
| Cu4-O1D     | 2.235(6)               | 0.2225279           |                                  |
| Cu4-O7B     | 2.8362(5)              | 0.0438243           | $\Sigma(\text{Cu4}) = 2.1197235$ |
| Cu4-N41     | 2.0462(7)              | 0.4503015           |                                  |
| Cu4-N42     | 1.9937(5)              | 0.5189509           |                                  |
| Cu4-N43     | 2.03(5)                | 0.4704554           |                                  |

| <b>Bond</b> | <b>Bond Length (Å)</b> | <b>Bond Valence</b> | <b>Bond Valence Sum</b>         |
|-------------|------------------------|---------------------|---------------------------------|
| S1-O1S1     | 1.4332(4)              | 1.6747697           |                                 |
| S1-O2S      | 1.4822(4)              | 1.4670348           | $\Sigma(\text{S1}) = 5.8269783$ |
| S1-O34S     | 1.514(4)               | 1.3462155           |                                 |
| S1-O15S     | 1.5160(4)              | 1.3389583           |                                 |

| <b>Bond</b> | <b>Bond Length (Å)</b> | <b>Bond Valence</b> | <b>Bond Valence Sum</b>  |
|-------------|------------------------|---------------------|--------------------------|
| S2-O1S2     | 1.4284(4)              | 1.696638            |                          |
| S2-O1S      | 1.4563(4)              | 1.5734069           | $\Sigma(S2) = 5.9869669$ |
| S2-O23S     | 1.5101(4)              | 1.3604804           |                          |
| S2-O45S     | 1.5112(4)              | 1.3564417           |                          |

| <b>Bond</b> | <b>Bond Length (Å)</b> | <b>Bond Valence</b> | <b>Bond Valence Sum</b>  |
|-------------|------------------------|---------------------|--------------------------|
| S3-O1S3     | 1.4333(4)              | 1.6743171           |                          |
| S3-O6S      | 1.4665(4)              | 1.5306243           | $\Sigma(S3) = 5.9182152$ |
| S3-O91S     | 1.5096(4)              | 1.3623201           |                          |
| S3-O78S     | 1.5127(4)              | 1.3509537           |                          |

| <b>Bond</b> | <b>Bond Length (Å)</b> | <b>Bond Valence</b> | <b>Bond Valence Sum</b> |
|-------------|------------------------|---------------------|-------------------------|
| S4-O1S4     | 1.4303(4)              | 1.6879479           |                         |
| S4-O7S      | 1.4831(4)              | 1.4634707           | $\Sigma(S1) = 5.901076$ |
| S4-O89S     | 1.5014(4)              | 1.3928491           |                         |
| S4-O61S     | 1.5111(4)              | 1.3568083           |                         |

**Table S2: List of Hydrogen-bond interactions present in compound 1**

| S No | Donor --- H ... Acceptor              | D H (Å) | H ... A (Å) | D ... A (Å (°)) | D H ... A (°) |
|------|---------------------------------------|---------|-------------|-----------------|---------------|
| 1.   | O1W --- H1WA ... O2D <sup>#1</sup>    | 0.89    | 1.91        | 2.6749(1)       | 142           |
| 2.   | O1W --- H1WB ... O7S                  | 0.88    | 1.95        | 2.6911(1)       | 141           |
| 3.   | C4D --- H4D2 ... O9A <sup>#2</sup>    | 0.98    | 2.56        | 3.3648(1)       | 139           |
| 4.   | C111 --- H111 ... O1C                 | 0.95    | 2.49        | 3.0429(1)       | 117           |
| 5.   | C112 --- H112 ... O5A <sup>#3</sup>   | 0.95    | 2.48        | 3.127(1)        | 125           |
| 6.   | C114 --- H114 ... O7A                 | 0.95    | 2.49        | 3.2609(1)       | 138           |
| 7.   | C115 --- H115 ... O6C                 | 0.95    | 2.55        | 3.1276(1)       | 119           |
| 8.   | C121 --- H121 ... O1C                 | 0.95    | 2.40        | 3.0068(1)       | 122           |
| 9.   | C123 --- H123 ... O1S3 <sup>#4</sup>  | 0.95    | 2.41        | 3.1067(1)       | 130           |
| 10.  | C125 --- H125 ... O6S                 | 0.95    | 2.46        | 3.0364(1)       | 119           |
| 11.  | C131 --- H131 ... O6C                 | 0.95    | 2.45        | 3.0572(1)       | 122           |
| 12.  | C132 --- H132 ... O10A <sup>#5</sup>  | 0.95    | 2.50        | 3.0511(1)       | 117           |
| 13.  | C134 --- H134 ... O2B                 | 0.95    | 2.45        | 3.2298(1)       | 139           |
| 14.  | C135 --- H135 ... O1C                 | 0.95    | 2.52        | 3.1409(1)       | 123           |
| 15.  | C141 --- H141 ... O6C                 | 0.95    | 2.32        | 2.9412(1)       | 122           |
| 16.  | C143 --- H143 ... O1S2 <sup>#6</sup>  | 0.95    | 2.38        | 3.0218(1)       | 125           |
| 17.  | C144 --- H144 ... O1S2 <sup>#6</sup>  | 0.95    | 2.55        | 3.1004(1)       | 117           |
| 18.  | C145 --- H145 ... O1C                 | 0.95    | 2.52        | 3.1455(1)       | 123           |
| 19.  | C145 --- H145 ... O1S                 | 0.95    | 2.36        | 3.0695(1)       | 131'          |
| 20.  | C211 --- H211 ... O8A <sup>#7</sup>   | 0.95    | 2.51        | 3.0814(1)       | 118           |
| 21.  | C211 --- H211 ... O8B <sup>#7</sup>   | 0.95    | 2.56        | 3.2734(1)       | 132'          |
| 22.  | C212 --- H212 ... O1S4 <sup>#8</sup>  | 0.95    | 2.59        | 3.3551(1)       | 138           |
| 23.  | C213 --- H213 ... O8B <sup>#8</sup>   | 0.95    | 2.59        | 3.2657(1)       | 128           |
| 24.  | C221 --- H221 ... O8A <sup>#7</sup>   | 0.95    | 2.46        | 2.9977(1)       | 116           |
| 25.  | C231 --- H231 ... O12 <sup>#5</sup>   | 0.95    | 2.32        | 3.2622(1)       | 169           |
| 26.  | C225 --- H225 ... O10C                | 0.95    | 2.56        | 3.0821(1)       | 115           |
| 27.  | C231 --- H231 ... O10A                | 0.95    | 2.45        | 3.2887(1)       | 147           |
| 28.  | C232 --- H232 ... O10A <sup>#5</sup>  | 0.95    | 2.52        | 3.1621(1)       | 125           |
| 29.  | C245 --- H245 ... O78 <sup>#7</sup>   | 0.95    | 2.54        | 3.3075(1)       | 138           |
| 30.  | C311 --- H311 ... O5C                 | 0.95    | 2.547       | 3.0542(1)       | 112           |
| 31.  | C313 --- H313 ... O67 <sup>#3</sup>   | 0.95    | 2.58        | 3.4912(1)       | 161           |
| 32.  | C315 --- H315 ... O3A <sup>#7</sup>   | 0.95    | 2.51        | 3.0539(1)       | 117           |
| 33.  | C321 --- H321 ... O5A                 | 0.95    | 2.39        | 3.2779(1)       | 155           |
| 34.  | C331 --- H331 ... O5C                 | 0.95    | 2.56        | 3.150(1)        | 117           |
| 35.  | C335 --- H335 ... O23 <sup>#9</sup>   | 0.95    | 2.43        | 3.1636(1)       | 133           |
| 36.  | C341 --- H341 ... O5C                 | 0.95    | 2.55        | 3.1456(1)       | 121           |
| 37.  | C343 --- H343 ... O3B <sup>#10</sup>  | 0.95    | 2.50        | 3.1667(1)       | 127           |
| 38.  | C344 --- H344 ... O1S1 <sup>#10</sup> | 0.95    | 2.57        | 3.3941(1)       | 145           |
| 39.  | C345 --- H345 ... O3A <sup>#9</sup>   | 0.95    | 2.46        | 3.0931(1)       | 124           |

|     |                                      |      |      |           |      |
|-----|--------------------------------------|------|------|-----------|------|
| 40. | C345 --- H345 ... O3B <sup>#9</sup>  | 0.95 | 2.52 | 3.2496(1) | 134' |
| 41. | C411 --- H411 ... O7B                | 0.95 | 2.33 | 3.1517(1) | 144  |
| 42. | C412 --- H412 ... O4A <sup>#3</sup>  | 0.95 | 2.39 | 3.2391(1) | 149  |
| 43. | C414 --- H414 ... O23 <sup>#11</sup> | 0.95 | 2.39 | 3.1536(1) | 137  |
| 44. | C415 --- H415 ... O1D                | 0.95 | 2.46 | 3.1188(1) | 126  |
| 45. | C415 --- H415 ... O2S <sup>#11</sup> | 0.95 | 2.54 | 3.3266(1) | 140' |
| 46. | C421 --- H421 ... O78                | 0.95 | 2.42 | 3.1576(1) | 134  |
| 47. | C424 --- H424 ... O9A <sup>#12</sup> | 0.95 | 2.56 | 3.1848(1) | 124  |
| 48. | C425 --- H425 ... O2A <sup>#11</sup> | 0.95 | 2.39 | 3.2930(1) | 160  |
| 49. | C432 --- H432 ... O6A                | 0.95 | 2.43 | 3.1875(1) | 137  |
| 50. | C434 --- H434 ... O3B                | 0.95 | 2.40 | 3.1756(1) | 139  |

Symmetry transformations used to generate equivalent atoms:

$$\#1 = x, y, 1+z$$

$$\#2 = 2-x, 1/2+y, 3/2-z$$

$$\#3 = 1-x, -y, 2-z$$

$$\#4 = 2-x, -y, 2-z$$

$$\#5 = 2-x, 1-y, 2-z$$

$$\#6 = 1-x, 1-y, 2-z$$

$$\#7 = x, 1+y, z$$

$$\#8 = 2-x, 1/2+y, 5/2-z$$

$$\#9 = x, -1+y, z$$

$$\#10 = 1-x, -1/2+y, 3/2-z$$

$$\#11 = x, 1/2-y, 1/2+z$$

$$\#12 = 2-x, -1/2+y, 5/2-z$$

**Table S3: Comparison of literature reports of oxidative desulfurization process studied with dibenzothiophene and polyoxomolybdates as catalysts.**

| Sl. No. | Catalyst                                                                                                                    | Oxidant        | Temperature (°C) | % Removal | References   |
|---------|-----------------------------------------------------------------------------------------------------------------------------|----------------|------------------|-----------|--------------|
| 1.      | $H_6P_2Mo_{18}O_{62}$                                                                                                       | $H_2O_2/HCOOH$ | 70               | 60        | 104          |
| 2.      | $H_6PMo_9V_3O_{40}$                                                                                                         | $H_2O_2/HCOOH$ | 70               | 83        | 104          |
| 3.      | $[Co(BBPTZ)_3][HPMo_{12}O_{40}] \cdot 24H_2O$                                                                               | TBHP           | 50               | 99.1      | 105          |
| 4.      | $[Omim]_3PMo_{12}O_{40}$                                                                                                    | TBHP           | 60               | 100       | 106          |
| 5.      | $[Cu^{II}(C_5H_5N)_4]_3[Mo^{VI}_5O_{15}(SO_4)_2] \{Cu^{II}(C_5H_5N)_3\{DMF\}(H_2O)\}; [Mo^{VI}_5O_{15}(SO_4)_2] \cdot 2DMF$ | TBHP           | 60               | 100       | This article |

BBPTZ: 4,4'-bis(1,2,4-triazol-1-ylmethyl)biphenyl]; Omim: 1-octyl-3-methylimidazolium, TBHP: Tetrabutyl hydroperoxide



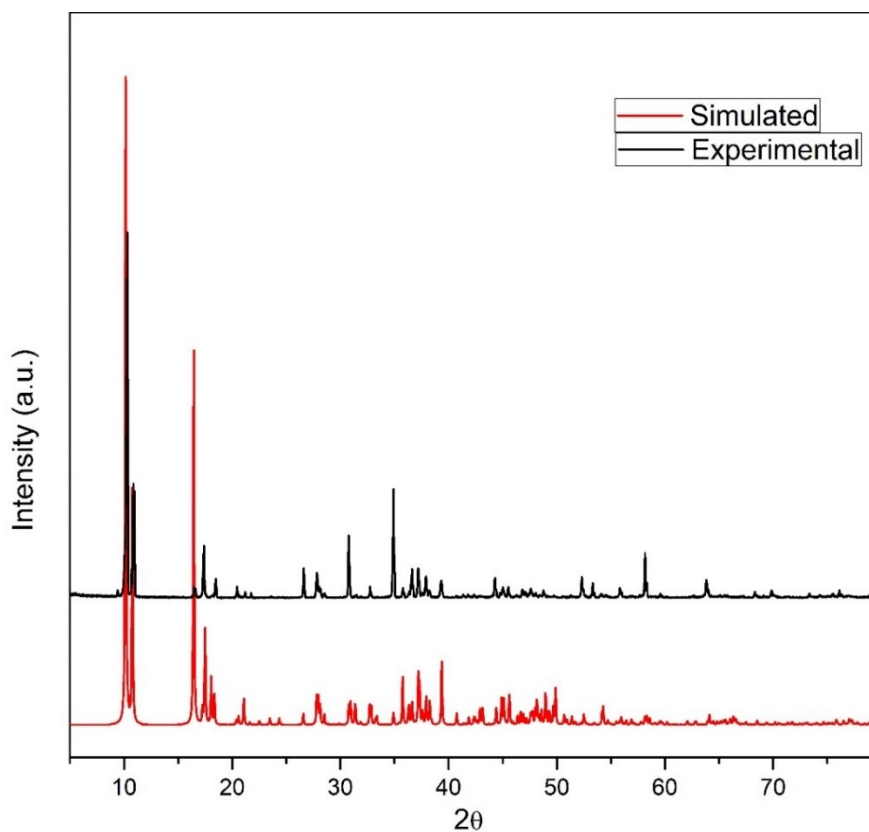

(a)

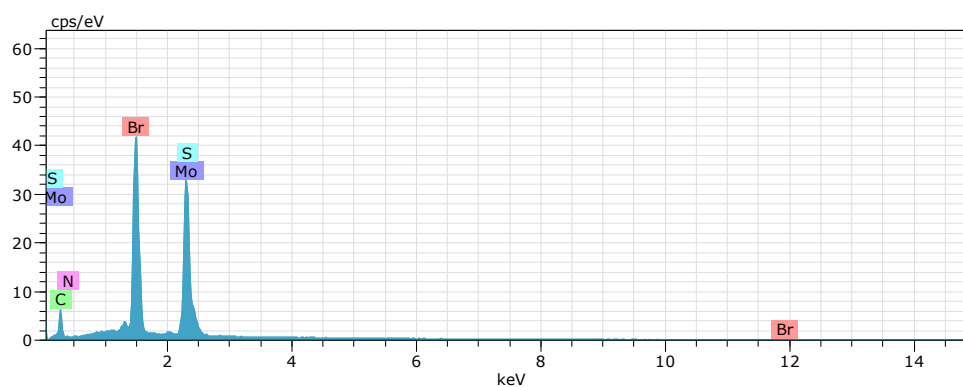

| Compound                                           | Elements | Atomic weight (%) | Approx. mol ratio (approx.) |
|----------------------------------------------------|----------|-------------------|-----------------------------|
| $(\text{NEt}_4)_2\text{Mo}_3\text{S}_7\text{Br}_6$ | Mo       | 5.88              | 1                           |
|                                                    | S        | 11.24             | 2.2                         |
|                                                    | Br       | 10.02             | 2                           |
|                                                    | C        | 25.11             | 5                           |
|                                                    | N        | 7.01              | 1                           |

(b)

**Figure S1:** (a) Comparative P-XRD data for  $(\text{NH}_4)_2\text{Mo}_3\text{S}_{13}$ , and (b) EDX analysis data for  $(\text{NEt}_4)_2\text{Mo}_3\text{S}_7\text{Br}_6$  with elemental percentage distribution shown in table.

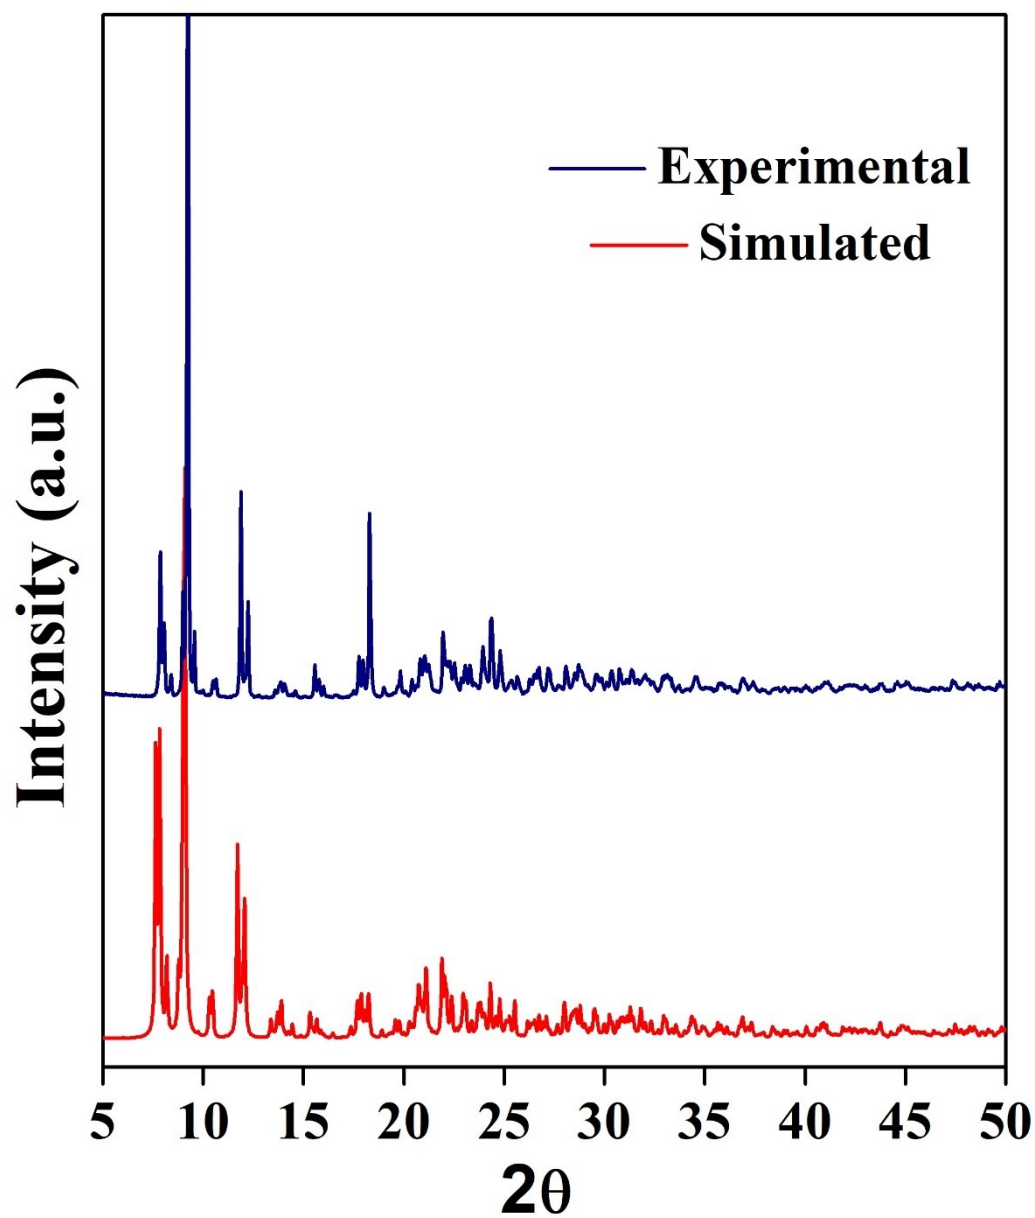

**Figure S2:** Comparative simulated and experimental P-XRD of compound 1.

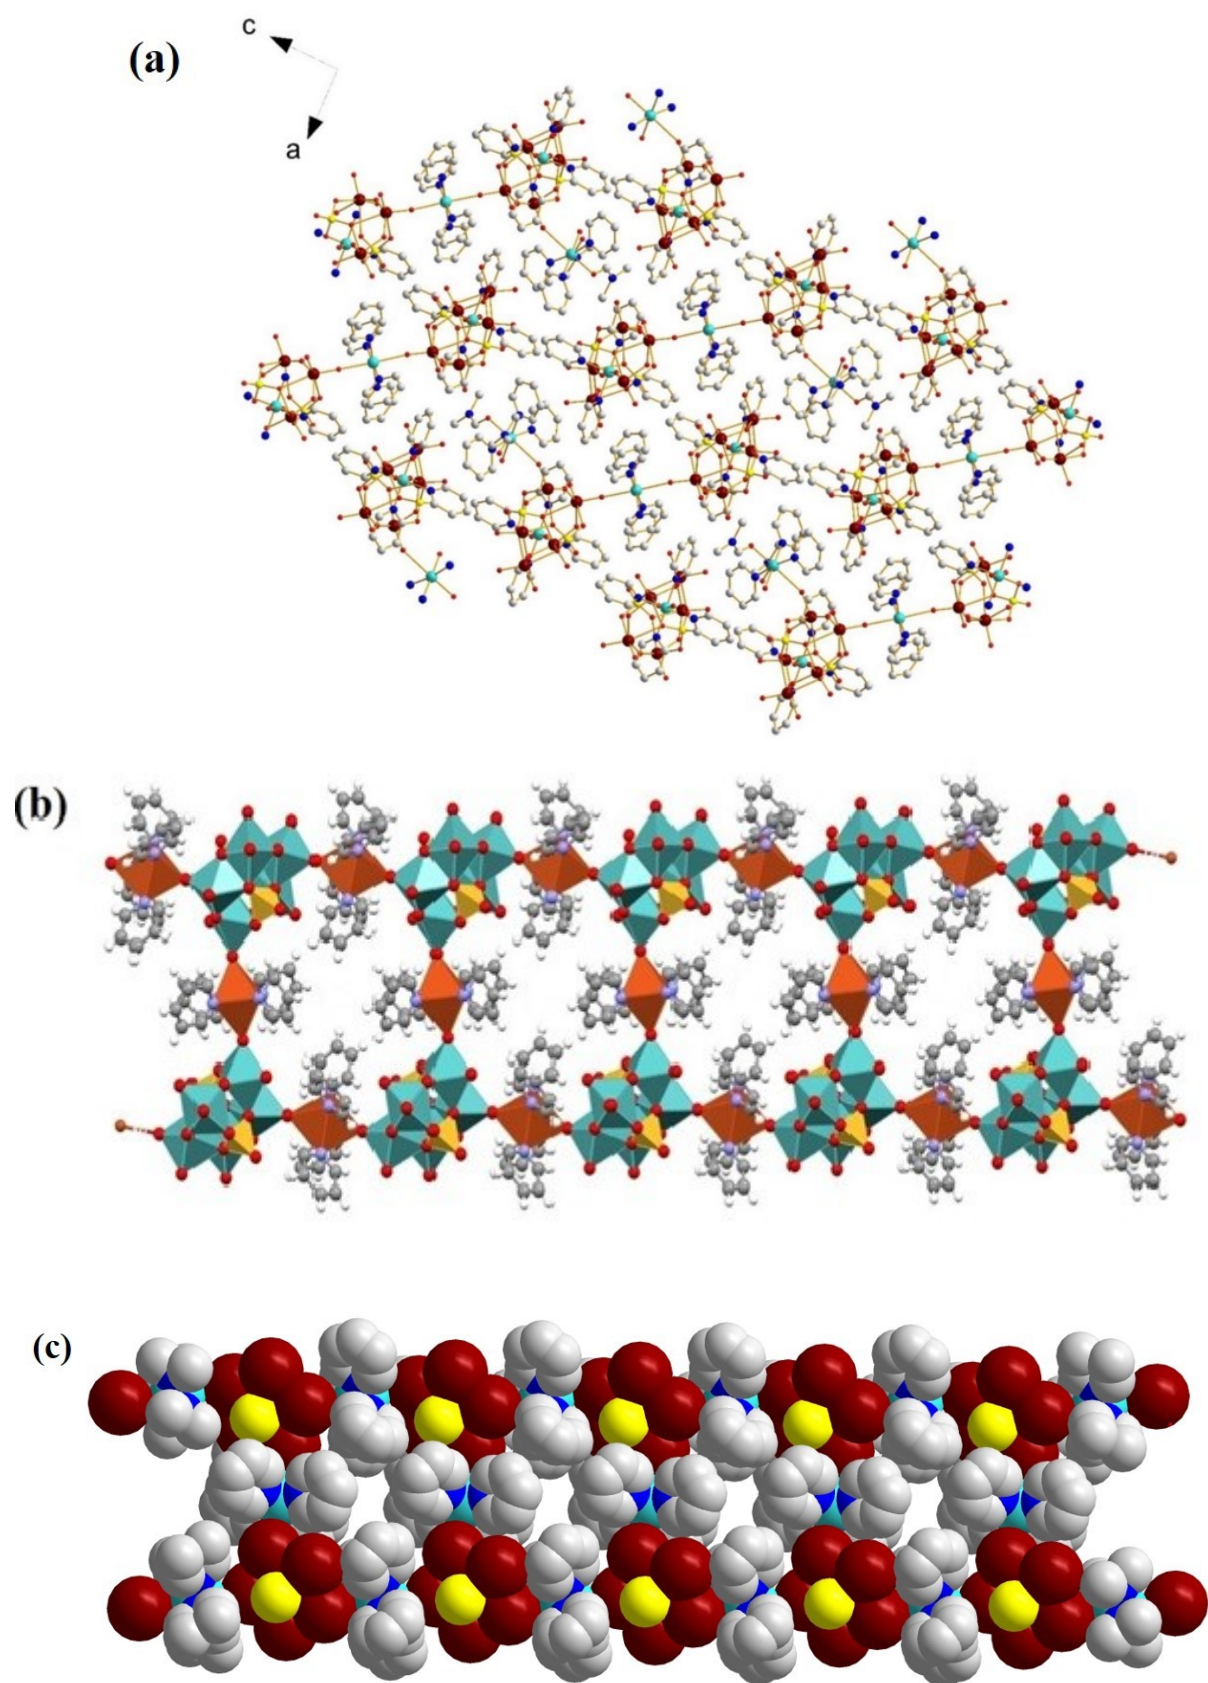

**Figure S3:** (a) Ball and stick, (b) Polyhedral, and (c) Space-filling model of interdigitated architecture of **1**; (Colour code: Mo: Dark red, Cu: Turquoise, S: Yellow, O: Red, N: Blue, C: Grey, H: white).

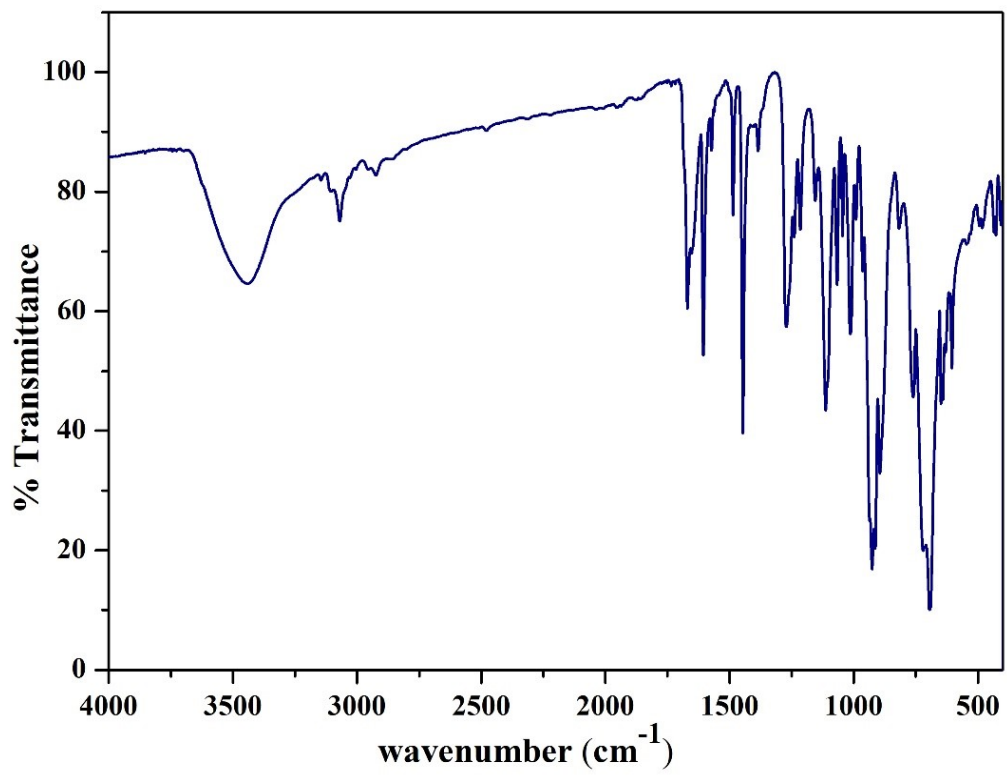

**Figure S4:** Infrared spectrum of compound 1.

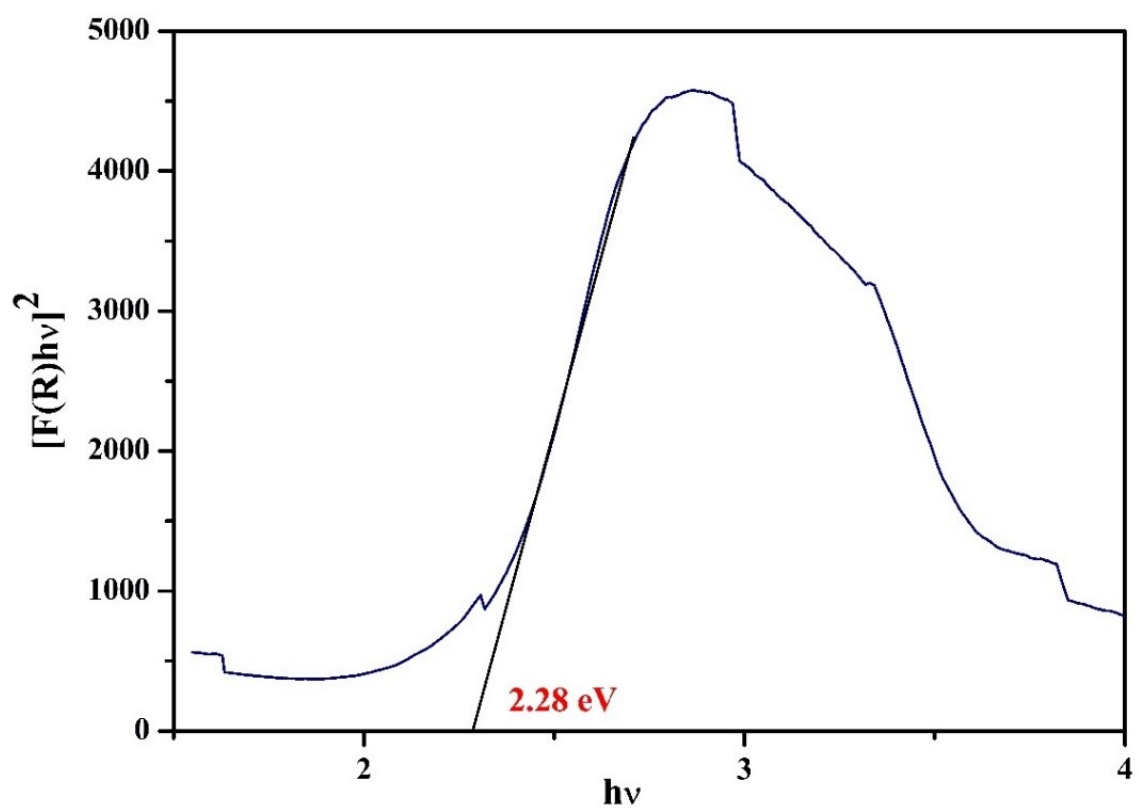

**Figure S5:** Kubelka-Munk plot of UV-DRS spectra of compound **1** showing direct band energy gap ( $E_g$ ).

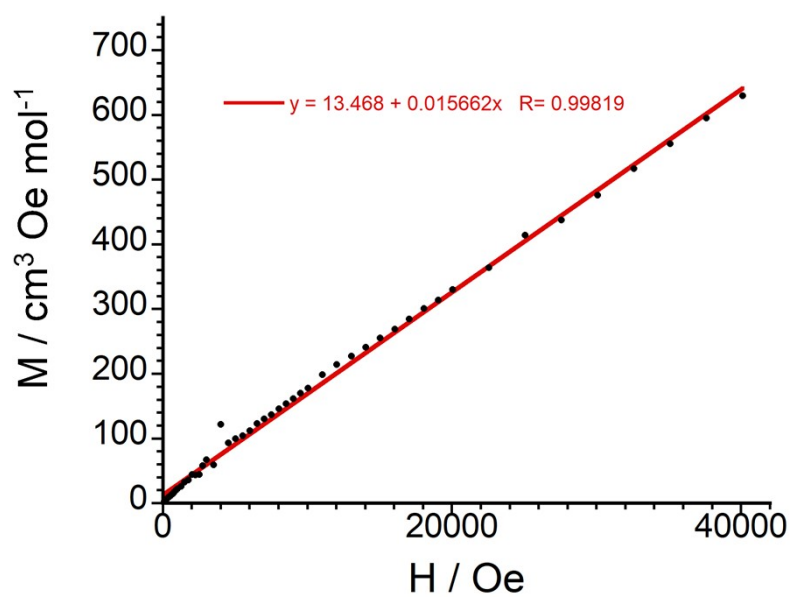

(a)

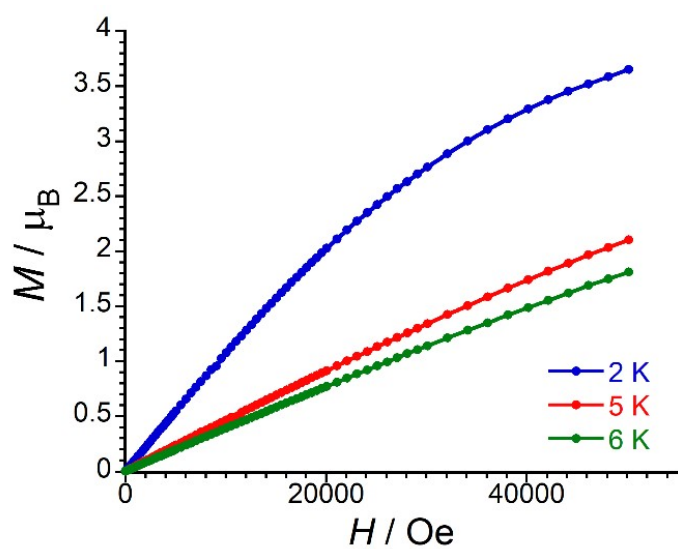

(b)

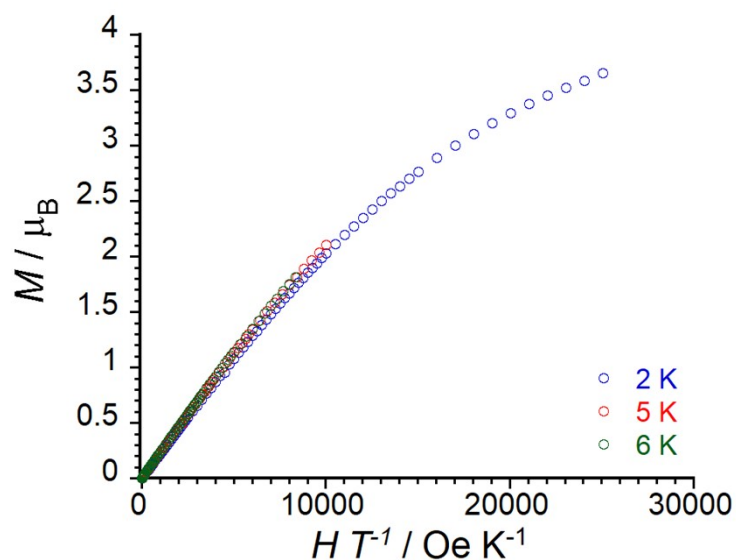

(c)

**Figure S6:** (a) Field dependence of the magnetization plotted as  $M$  vs  $H$  for **1** at 100 K. The solid lines represent the best fit. Field dependence of the magnetization as (b)  $M$  vs  $H$  (left) and, (c)  $M$  vs  $H/T$  (right) plots for **1** at 2, 5, and 6 K. The solid lines are guide for the eyes.

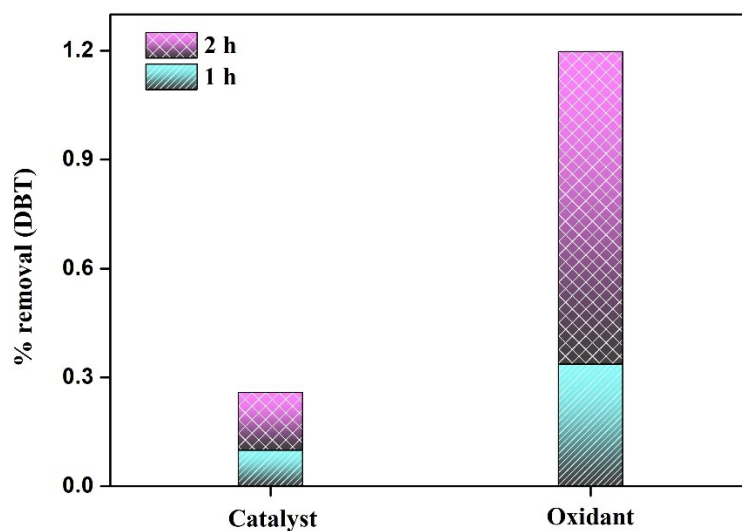

(a)

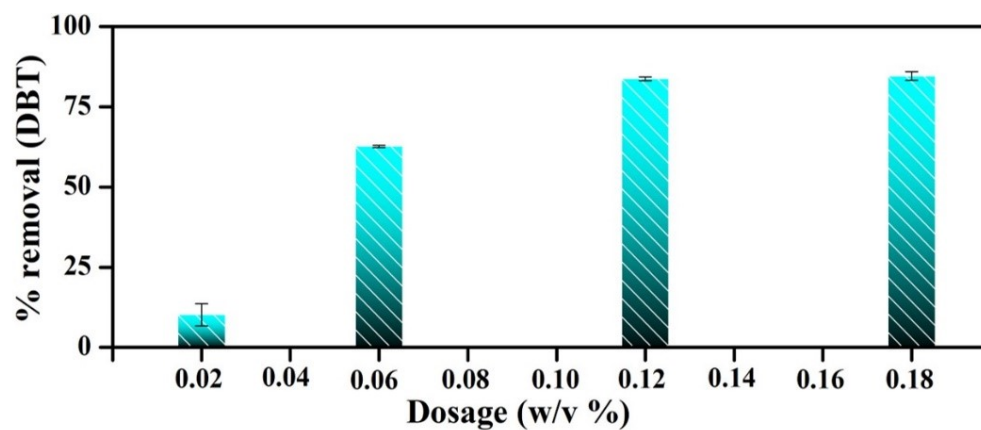

(b)

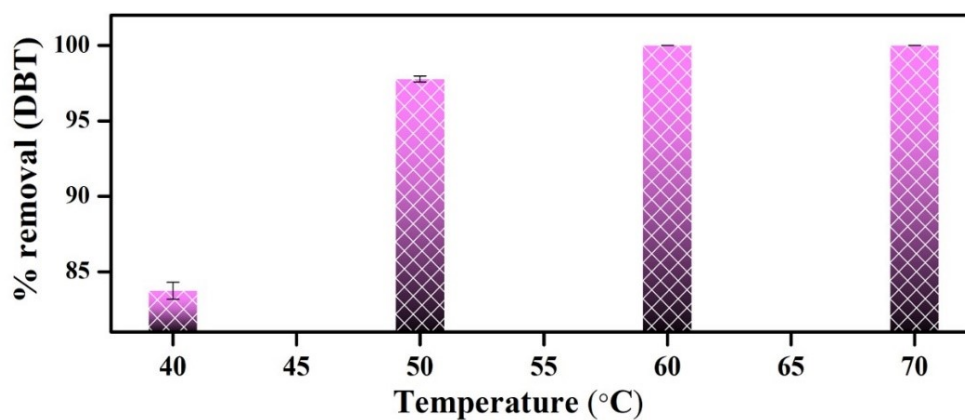

(c)

**Figure S7:** (a) Control catalysis experiment(s) without catalyst or oxidant. Bar-chart illustrating the optimization of ODS parameters with respect to (b) catalyst dosage, (c) temperature.

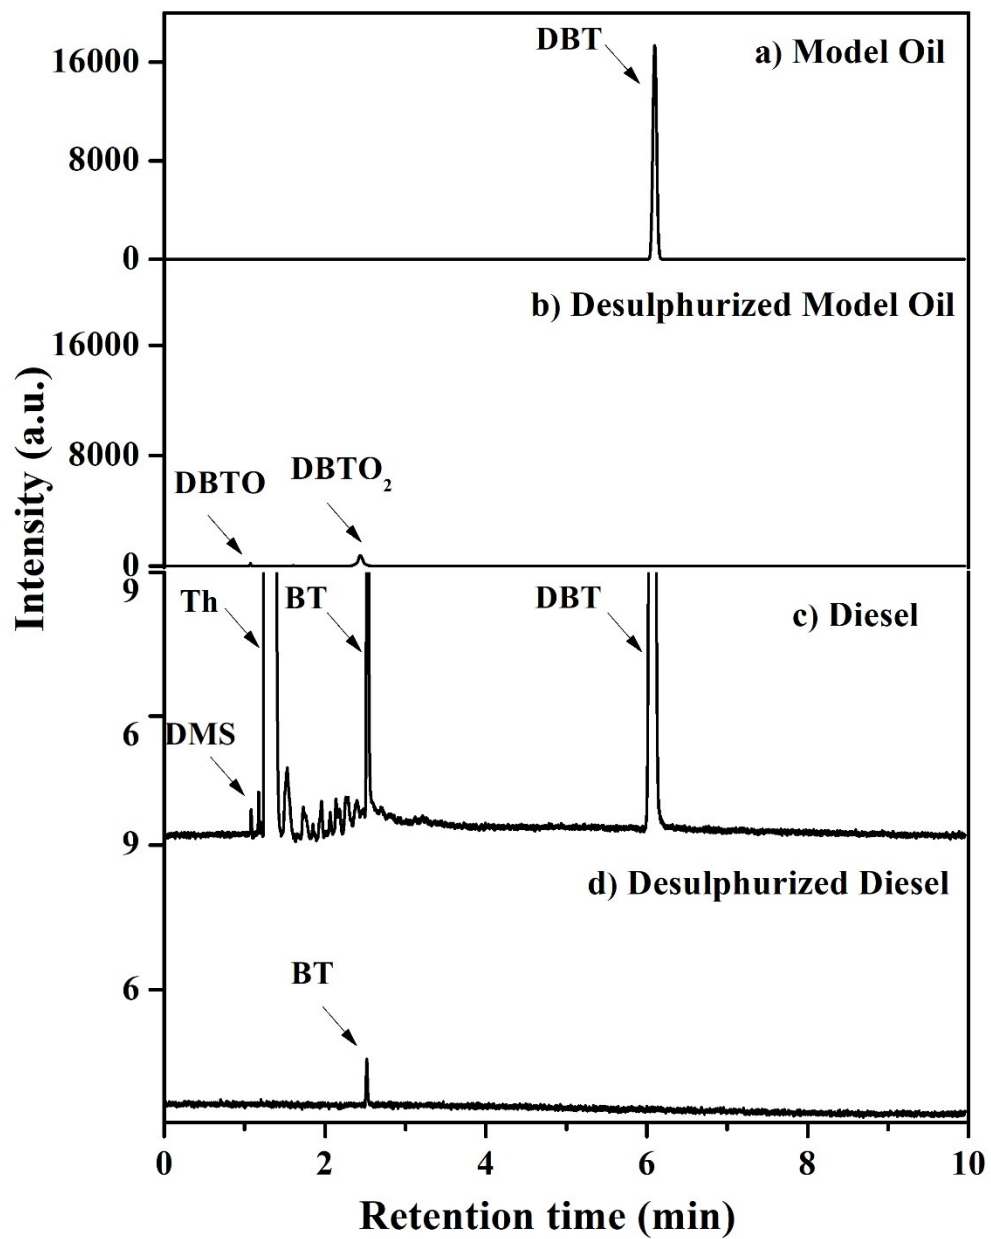

**Figure S8:** GC-FPD chromatograms of aliquots extracted during ODS process of (a) fresh model oil, (b) desulphurized model oil, (c) fresh diesel, and (d) desulphurized diesel.



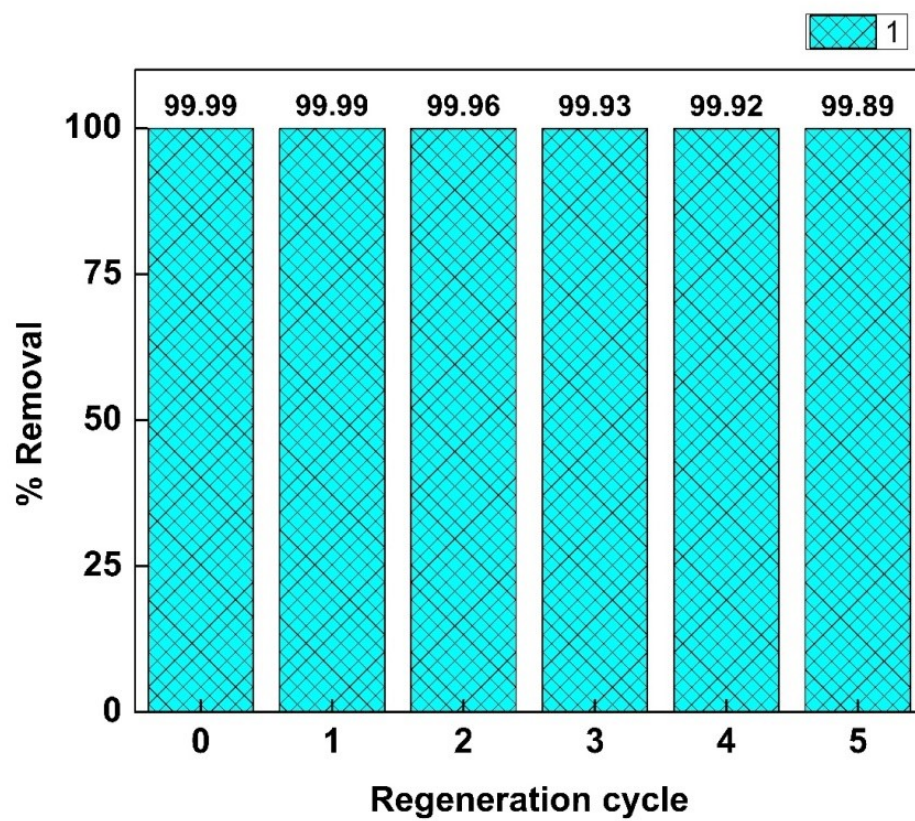

**Figure S9:** Bar-chart showing regeneration and reusability of compound **1** for ODS catalysis.

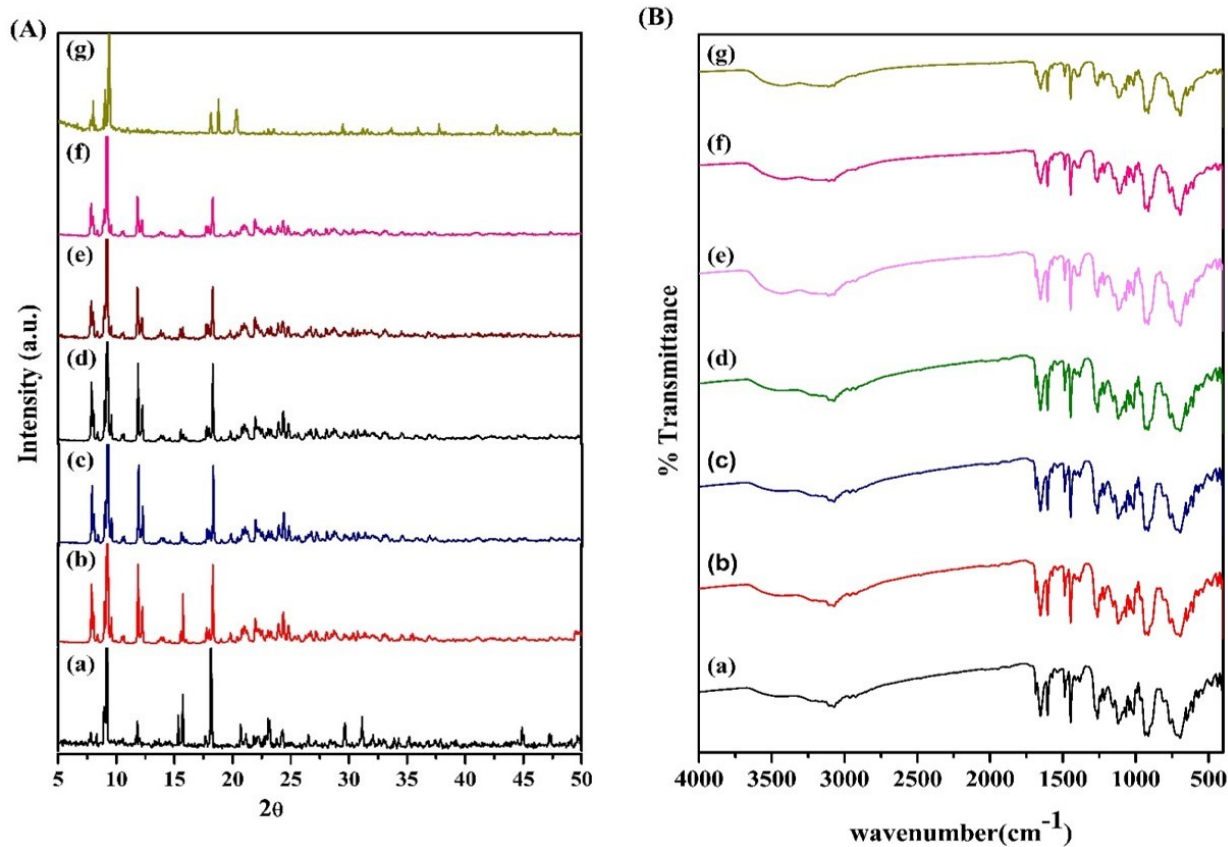

**Figure S10:** Comparative (A) P-XRD and, (B) IR spectra of compound **1** during ODS studies along multiple cycles; (a) pristine catalyst, (b) after initial cycle of oxidative desulfurization (c) after regeneration - cycle 1; (d) after regeneration - cycle 2; (e) after regeneration - cycle 3; (f) after regeneration - cycle 4; (g) after regeneration - cycle 5.

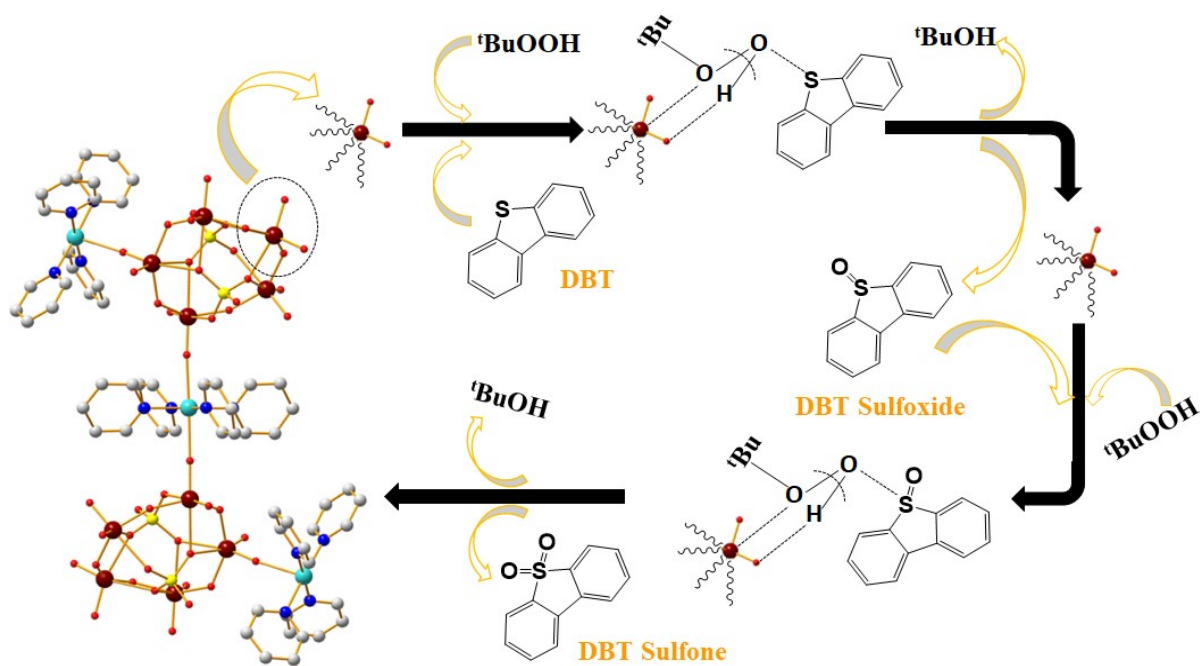

**Figure S11:** Proposed mechanism of catalytic ODS for DBT with compound 1 as catalyst.
